# Supplementary material for: Past agricultural practices explain old field biodiversity and community composition in annually mowed grasslands: a case study of grazing and cultivation legacies in the northeastern United States
Source: PeerJ journal article supplement (doi:10.7717/peerj.19420), 2025-05-09
Supplement: S3_Table.pdf [file S3_Table.pdf]

| <b>Environmental Vector</b> | <b>r<sup>2</sup></b> | <b>p value</b>  |
|-----------------------------|----------------------|-----------------|
| Native                      | 0.0485               | 0.508           |
| Nonnative                   | 0.0129               | 0.830           |
| Annual Herb                 | 0.0188               | 0.753           |
| Perennial Herb              | 0.0319               | 0.622           |
| Graminoid                   | 0.0248               | 0.698           |
| Woody                       | 0.0660               | 0.373           |
| Moss                        | 0.0452               | 0.528           |
| <b>Fern</b>                 | <b>0.3178</b>        | <b>** 0.009</b> |
| Soil Type                   | 0.0514               | 0.524           |
| Soil Drainage               | 0.0514               | 0.524           |
| Elevation                   | 0.0570               | 0.418           |

**S3 Table. List of environmental vectors tested in NMDS.** Significant vectors are displayed in bold.
